# Supplementary material for: Molecular Genetic Profile of 300 Japanese Patients with Diffuse Gliomas Using a Glioma-tailored Gene Panel
Source: PubMed Central journal article supplement — Neurol Med Chir (Tokyo). 2022 Aug 27;62(9):391–9. doi: 10.2176/jns-nmc.2022-0103 (PMC9534570; doi:10.2176/jns-nmc.2022-0103), 2022-08-27
Supplement: 1349-8029-62-0391-s002.pdf [file 1349-8029-62-0391-s002.pdf]

Supplementary Table S2. Clinical information and molecular status in patients with DA.

| research ID | WHO 2016 diagnosis                      | WHO 2021 diagnosis            | Sex    | Age | OS (months) | OS censoring (0: censored, 1: dead) | PFS (months) | PFS censoring (0: censored, 1: rec) | EGFR (CNV) | EGFR (SNV) | CDKN2A/B | PTEN (CNV) | PTEN (SNV) | RBI (CNV) | RBI (SNV) | NF1 (CNV) | NF1 (SNV) | ATRX (CNV) | ATRX (SNV) | IDH1         | PDGFRA  | TERTp     |
|-------------|-----------------------------------------|-------------------------------|--------|-----|-------------|-------------------------------------|--------------|-------------------------------------|------------|------------|----------|------------|------------|-----------|-----------|-----------|-----------|------------|------------|--------------|---------|-----------|
| 186         | Diffuse astrocytoma, IDH-mut, grade II  | Astrocytoma, IDH-mut, grade 2 | Female | 44  | 7           | 0                                   | 7            | 0                                   | Intact     | wt         | Intact   | Intact     | wt         | Intact    | wt        | Intact    | p.T2034I  | Intact     | p.E2172G   | R132H, p.D31 | wt      | wt        |
| 187         | Diffuse astrocytoma, IDH-mut, grade II  | Astrocytoma, IDH-mut, grade 2 | Male   | 50  | 54          | 0                                   | 54           | 0                                   | Intact     | wt         | Intact   | Intact     | wt         | Intact    | p.S503F   | Intact    | wt        | Intact     | p.K1600E   | p.R132H      | wt      | wt        |
| 188         | Diffuse astrocytoma, IDH-mut, grade II  | Astrocytoma, IDH-mut, grade 2 | Male   | 34  | 22          | 0                                   | 22           | 0                                   | Intact     | wt         | Intact   | Intact     | wt         | Intact    | wt        | Intact    | wt        | Intact     | p.K425fs   | p.R132H      | wt      | wt        |
| 189         | Diffuse astrocytoma, IDH-mut, grade II  | Astrocytoma, IDH-mut, grade 2 | Male   | 28  | 37          | 0                                   | 37           | 0                                   | Intact     | wt         | Intact   | Hetloss    | wt         | Intact    | wt        | Intact    | wt        | Intact     | p.K983fs   | p.R132H      | wt      | wt        |
| 190         | Diffuse astrocytoma, IDH-mut, grade II  | Astrocytoma, IDH-mut, grade 2 | Male   | 32  | 144         | 1                                   | 16           | 1                                   | Intact     | wt         | Intact   | Intact     | wt         | Hetloss   | wt        | Intact    | wt        | Intact     | p.R1426*   | p.R132H      | wt      | wt        |
| 191         | Diffuse astrocytoma, IDH-mut, grade II  | Astrocytoma, IDH-mut, grade 2 | Male   | 53  | 22          | 0                                   | 22           | 0                                   | Intact     | wt         | Intact   | Intact     | wt         | Intact    | wt        | Intact    | wt        | Intact     | p.R1817G   | p.R132H      | wt      | wt        |
| 192         | Diffuse astrocytoma, IDH-mut, grade II  | Astrocytoma, IDH-mut, grade 2 | Male   | 63  | 66          | 0                                   | 12           | 1                                   | Intact     | wt         | Intact   | Intact     | wt         | Intact    | wt        | Intact    | wt        | Intact     | p.S112*    | p.R132H      | wt      | wt        |
| 193         | Diffuse astrocytoma, IDH-mut, grade II  | Astrocytoma, IDH-mut, grade 2 | Male   | 31  | 145         | 0                                   | 35           | 1                                   | Intact     | wt         | Intact   | Intact     | wt         | Intact    | wt        | Intact    | wt        | Intact     | p.S1986fs  | p.R132H      | wt      | wt        |
| 194         | Diffuse astrocytoma, IDH-wild, grade II | GBM, IDH-wild, grade 4        | Male   | 67  | 126         | 0                                   | 126          | 0                                   | Gain       | wt         | Intact   | Hetloss    | wt         | Hetloss   | wt        | Hetloss   | p.P1084R  | Intact     | wt         | wt           | wt      | c.-124C>T |
| 195         | Diffuse astrocytoma, IDH-wild, grade II | GBM, IDH-wild, grade 4        | Female | 88  | 13          | 1                                   | 7            | 1                                   | Intact     | wt         | Intact   | Homdel     | c.367C>T   | Intact    | wt        | Intact    | p.E1582fs | Intact     | wt         | wt           | wt      | c.-124C>T |
| 196         | Diffuse astrocytoma, IDH-wild, grade II | GBM, IDH-wild, grade 4        | Male   | 67  | 19          | 0                                   | 19           | 0                                   | Intact     | wt         | Intact   | Homdel     | wt         | Intact    | wt        | Intact    | wt        | Intact     | wt         | wt           | wt      | c.-124C>T |
| 197         | Diffuse astrocytoma, IDH-wild, grade II | GBM, IDH-wild, grade 4        | Female | 79  | 10          | 0                                   | 8            | 1                                   | Amp        | p.S437C    | Intact   | Intact     | wt         | Intact    | wt        | Intact    | wt        | Intact     | wt         | wt           | p.R690K | c.-124C>T |
| 198         | Diffuse astrocytoma, IDH-wild, grade II | GBM, IDH-wild, grade 4        | Male   | 82  | 14          | 0                                   | 14           | 0                                   | Intact     | wt         | Homdel   | Intact     | wt         | Intact    | wt        | Intact    | wt        | Intact     | wt         | wt           | wt      | c.-124C>T |
| 199         | Diffuse astrocytoma, IDH-mut, grade II  | Astrocytoma, IDH-mut, grade 2 | Male   | 30  | 80          | 0                                   | 72           | 1                                   | Intact     | wt         | Intact   | Homdel     | wt         | Homdel    | wt        | Intact    | wt        | Homdel     | wt         | p.R132H      | wt      | wt        |
| 200         | Diffuse astrocytoma, IDH-mut, grade II  | Astrocytoma, IDH-mut, grade 2 | Male   | 31  | 32          | 0                                   | 32           | 0                                   | Intact     | wt         | Intact   | Homdel     | wt         | Homdel    | wt        | Intact    | wt        | Homdel     | wt         | p.R132H      | wt      | wt        |
| 201         | Diffuse astrocytoma, IDH-mut, grade II  | Astrocytoma, IDH-mut, grade 2 | Female | 33  | 0           | 0                                   | 0            | 0                                   | Intact     | wt         | Intact   | Intact     | wt         | Intact    | wt        | Intact    | wt        | Intact     | wt         | p.R132C      | wt      | wt        |
| 202         | Diffuse astrocytoma, IDH-mut, grade II  | Astrocytoma, IDH-mut, grade 2 | Female | 59  | 0           | 0                                   | 0            | 0                                   | Intact     | wt         | Intact   | Intact     | wt         | Intact    | wt        | Intact    | wt        | Homdel     | wt         | p.R132H      | wt      | wt        |
| 203         | Diffuse astrocytoma, IDH-mut, grade II  | Astrocytoma, IDH-mut, grade 2 | Male   | 32  | 47          | 0                                   | 47           | 0                                   | Intact     | wt         | Intact   | Intact     | wt         | Intact    | wt        | Intact    | wt        | Intact     | wt         | p.R132H      | wt      | wt        |
| 204         | Diffuse astrocytoma, IDH-mut, grade II  | Astrocytoma, IDH-mut, grade 2 | Female | 66  | 142         | 0                                   | 123          | 1                                   | Intact     | wt         | Intact   | Intact     | wt         | Intact    | wt        | Intact    | wt        | Intact     | wt         | p.R132H      | wt      | wt        |
| 205         | Diffuse astrocytoma, IDH-mut, grade II  | Astrocytoma, IDH-mut, grade 2 | Male   | 25  | 11          | 0                                   | 11           | 0                                   | Intact     | wt         | Intact   | Intact     | wt         | Intact    | wt        | Intact    | wt        | Intact     | wt         | p.R132H      | wt      | wt        |
| 206         | Diffuse astrocytoma, IDH-mut, grade II  | Astrocytoma, IDH-mut, grade 2 | Male   | 36  | 10          | 0                                   | 10           | 0                                   | Intact     | wt         | Intact   | Intact     | wt         | Intact    | wt        | Intact    | wt        | Intact     | wt         | p.R132H      | wt      | wt        |
| 207         | Diffuse astrocytoma, IDH-mut, grade II  | Astrocytoma, IDH-mut, grade 2 | Female | 47  | 6           | 0                                   | 6            | 0                                   | Intact     | wt         | Intact   | Intact     | wt         | Intact    | wt        | Intact    | wt        | Intact     | wt         | p.R132H      | wt      | wt        |
| 208         | Diffuse astrocytoma, IDH-mut, grade II  | Astrocytoma, IDH-mut, grade 2 | Female | 31  | 0           | 0                                   | 0            | 0                                   | Intact     | wt         | Intact   | Intact     | wt         | Intact    | wt        | Intact    | wt        | Intact     | wt         | p.R132H      | wt      | wt        |
| 209         | Diffuse astrocytoma, IDH-mut, grade II  | Astrocytoma, IDH-mut, grade 2 | Male   | 30  | 101         | 0                                   | 101          | 0                                   | Intact     | wt         | Intact   | Intact     | wt         | Intact    | wt        | Intact    | wt        | Intact     | wt         | p.R132H      | wt      | wt        |
| 210         | Diffuse astrocytoma, IDH-mut, grade II  | Astrocytoma, IDH-mut, grade 2 | Male   | 51  | 7           | 0                                   | 7            | 0                                   | Intact     | wt         | Intact   | Intact     | wt         | Intact    | wt        | Intact    | wt        | Intact     | wt         | p.R132H      | wt      | wt        |
| 211         | Diffuse astrocytoma, IDH-wild, grade II | NEC                           | Male   | 78  | 27          | 1                                   | 12           | 1                                   | Intact     | p.A289V    | Intact   | Homdel     | wt         | Homdel    | wt        | Intact    | wt        | Intact     | wt         | wt           | wt      | wt        |
| 212         | Diffuse astrocytoma, IDH-wild, grade II | NEC                           | Male   | 60  | 10          | 0                                   | 10           | 0                                   | Intact     | wt         | Intact   | Intact     | wt         | Homdel    | wt        | Intact    | wt        | Intact     | wt         | wt           | wt      | wt        |
| 213         | Diffuse astrocytoma, IDH-wild, grade II | NEC                           | Male   | 75  | 29          | 1                                   | 4            | 1                                   | Intact     | wt         | Intact   | Homdel     | wt         | Intact    | wt        | Intact    | wt        | Intact     | wt         | wt           | wt      | wt        |
| 214         | Diffuse astrocytoma, IDH-wild, grade II | NEC                           | Male   | 42  | 44          | 0                                   | 44           | 0                                   | Intact     | wt         | Intact   | Intact     | wt         | Intact    | wt        | Intact    | wt        | Intact     | wt         | wt           | wt      | wt        |
| 215         | Diffuse astrocytoma, IDH-wild, grade II | NEC                           | Female | 27  | 42          | 0                                   | 23           | 1                                   | Intact     | wt         | Intact   | Intact     | wt         | Intact    | wt        | Intact    | wt        | Intact     | wt         | wt           | wt      | wt        |
| 216         | Diffuse astrocytoma, IDH-wild, grade II | NEC                           | Female | 1   | 14          | 0                                   | 14           | 0                                   | Intact     | wt         | Intact   | Intact     | wt         | Intact    | wt        | Intact    | wt        | Intact     | wt         | wt           | wt      | wt        |
