# Supplementary material for: Molecular Genetic Profile of 300 Japanese Patients with Diffuse Gliomas Using a Glioma-tailored Gene Panel
Source: PubMed Central journal article supplement — Neurol Med Chir (Tokyo). 2022 Aug 27;62(9):391–9. doi: 10.2176/jns-nmc.2022-0103 (PMC9534570; doi:10.2176/jns-nmc.2022-0103), 2022-08-27
Supplement: 1349-8029-62-0391-s003.pdf [file 1349-8029-62-0391-s003.pdf]

Supplementary Table S3. Clinical information and molecular status in patients with AA.

| Research ID | WHO 2016 diagnosis                          | WHO 2021 diagnosis            | Sex    | Age | OS (months) | OS censoring (0: censored, 1: dead) | PFS (months) | PFS censoring (0: censored, 1: rec) | PDGFRA (CNV) | PDGFRA (SNV) | EGFR (CNV) | EGFR (SNV)          | CDKN2A/B | PTEN (CNV) | PTEN (SNV) | RB1 (CNV) | RB1 (SNV)  | NF1 (CNV) | NF1 (SNV)   | ATRX (CNV) | ATRX (SNV)     | IDH1    | TERTp     |
|-------------|---------------------------------------------|-------------------------------|--------|-----|-------------|-------------------------------------|--------------|-------------------------------------|--------------|--------------|------------|---------------------|----------|------------|------------|-----------|------------|-----------|-------------|------------|----------------|---------|-----------|
| 217         | Anaplastic astrocytoma, IDH-mut, grade III  | Astrocytoma, IDH-mut, grade 3 | Male   | 39  | 144         | 1                                   | 16           | 1                                   | Intact       | wt           | Intact     | wt                  | Intact   | Intact     | wt         | Homdel    | wt         | Intact    | wt          | Intact     | p.R1426*       | p.R132H | wt        |
| 218         | Anaplastic astrocytoma, IDH-mut, grade III  | Astrocytoma, IDH-mut, grade 3 | Male   | 37  | 56          | 0                                   | 56           | 0                                   | Intact       | wt           | Intact     | wt                  | Intact   | Intact     | wt         | Intact    | wt         | Intact    | wt          | Intact     | p.C1242fs      | p.R132H | wt        |
| 219         | Anaplastic astrocytoma, IDH-wild, grade III | GBM, IDH-wild, grade 4        | Female | 57  | 74          | 0                                   | 31           | 1                                   | Intact       | wt           | Amp        | wt                  | Homdel   | Hetloss    | wt         | Intact    | wt         | Intact    | wt          | Intact     | wt             | wt      | wt        |
| 220         | Anaplastic astrocytoma, IDH-mut, grade III  | Astrocytoma, IDH-mut, grade 4 | Male   | 35  | 56          | 1                                   | 43           | 1                                   | Intact       | wt           | Intact     | wt                  | Homdel   | Hetloss    | wt         | Hetloss   | wt         | Intact    | wt          | Intact     | p.S465*        | p.R132H | wt        |
| 221         | Anaplastic astrocytoma, IDH-mut, grade III  | Astrocytoma, IDH-mut, grade 3 | Male   | 46  | 48          | 0                                   | 48           | 0                                   | Intact       | wt           | Intact     | wt                  | Intact   | Intact     | wt         | Intact    | wt         | Intact    | wt          | Intact     | p.I565fs       | p.R132H | wt        |
| 222         | Anaplastic astrocytoma, IDH-wild, grade III | GBM, IDH-wild, grade 4        | Male   | 49  | 51          | 1                                   | 8            | 1                                   | Intact       | wt           | Amp        | p.R108K             | Intact   | Intact     | wt         | Intact    | c.861+2T>A | Intact    | wt          | Intact     | p.S2375dup     | wt      | c.-124C>T |
| 223         | Anaplastic astrocytoma, IDH-mut, grade III  | Astrocytoma, IDH-mut, grade 3 | Female | 67  | 39          | 1                                   | 19           | 1                                   | Intact       | wt           | Intact     | wt                  | Intact   | Intact     | wt         | Intact    | wt         | Intact    | wt          | Intact     | p.I347fs       | p.R132H | wt        |
| 224         | Anaplastic astrocytoma, IDH-mut, grade III  | Astrocytoma, IDH-mut, grade 3 | Male   | 31  | 78          | 1                                   | 55           | 1                                   | Intact       | wt           | Intact     | wt                  | Intact   | Intact     | wt         | Intact    | wt         | Intact    | p.F580del   | Intact     | p.K2182E       | p.R132H | wt        |
| 225         | Anaplastic astrocytoma, IDH-wild, grade III | NEC                           | Male   | 57  | 38          | 0                                   | 38           | 0                                   | Amp          | wt           | Intact     | wt                  | Intact   | Intact     | wt         | Hetloss   | wt         | Intact    | wt          | Intact     | wt             | wt      | wt        |
| 226         | Anaplastic astrocytoma, IDH-wild, grade III | GBM, IDH-wild, grade 4        | Female | 71  | 37          | 0                                   | 15           | 1                                   | Intact       | wt           | Amp        | p.A289D             | Intact   | Homdel     | wt         | Intact    | wt         | Intact    | wt          | Intact     | wt             | wt      | c.-146C>T |
| 227         | Anaplastic astrocytoma, IDH-wild, grade III | GBM, IDH-wild, grade 4        | Male   | 61  | 22          | 1                                   | 17           | 1                                   | Intact       | wt           | Amp        | p.A289T             | Intact   | Intact     | wt         | Intact    | wt         | Intact    | wt          | Intact     | wt             | wt      | c.-124C>T |
| 228         | Anaplastic astrocytoma, IDH-wild, grade III | NEC                           | Male   | 51  | 57          | 0                                   | 15           | 1                                   | Intact       | wt           | Intact     | wt                  | Intact   | Homdel     | wt         | Homdel    | wt         | Intact    | wt          | Hetloss    | wt             | wt      | wt        |
| 229         | Anaplastic astrocytoma, IDH-wild, grade III | NEC                           | Male   | 51  | 57          | 0                                   | 15           | 1                                   | Intact       | wt           | Intact     | wt                  | Intact   | Homdel     | wt         | Homdel    | wt         | Intact    | wt          | Homdel     | wt             | wt      | wt        |
| 230         | Anaplastic astrocytoma, IDH-wild, grade III | GBM, IDH-wild, grade 4        | Male   | 67  | 36          | 0                                   | 23           | 1                                   | Intact       | wt           | Intact     | p.G598V,<br>p.S768I | Intact   | Hetloss    | p.M199fs   | Intact    | wt         | Intact    | p.L792F     | Intact     | wt             | wt      | c.-124C>T |
| 231         | Anaplastic astrocytoma, IDH-mut, grade III  | Astrocytoma, IDH-mut, grade 3 | Female | 33  | 30          | 0                                   | 30           | 0                                   | Intact       | wt           | Intact     | wt                  | Intact   | Intact     | wt         | Intact    | wt         | Intact    | wt          | Intact     | p.E453*        | p.R132H | wt        |
| 232         | Anaplastic astrocytoma, IDH-wild, grade III | GBM, IDH-wild, grade 4        | Male   | 39  | 21          | 1                                   | 5            | 1                                   | Intact       | wt           | Amp        | p.T790M             | Intact   | Intact     | wt         | Intact    | wt         | Intact    | p.H1826P    | Intact     | wt             | wt      | c.-124C>T |
| 233         | Anaplastic astrocytoma, IDH-wild, grade III | GBM, IDH-wild, grade 4        | Male   | 69  | 24          | 0                                   | 4            | 1                                   | Intact       | wt           | Intact     | wt                  | Intact   | Hetloss    | p.E299*    | Intact    | wt         | Intact    | c.654+1delG | Intact     | wt             | wt      | c.-146C>T |
| 234         | Anaplastic astrocytoma                      | Astrocytoma, IDH-mut, grade 3 | Female | 25  | 54          | 0                                   | 54           | 0                                   | Intact       | wt           | Intact     | wt                  | Intact   | Intact     | wt         | Intact    | wt         | Intact    | wt          | Intact     | c.4699+2T>G    | p.R132H | wt        |
| 235         | Anaplastic astrocytoma                      | Astrocytoma, IDH-mut, grade 4 | Male   | 29  | 17          | 0                                   | 17           | 0                                   | Intact       | wt           | Intact     | wt                  | Homdel   | Intact     | wt         | Hetloss   | wt         | Intact    | p.P1398S    | Intact     | p.Q883Rfs*19   | p.R132H | wt        |
| 236         | Anaplastic astrocytoma                      | GBM, IDH-wild, grade 4        | Male   | 75  | 1           | 1                                   | 1            | 1                                   | Intact       | wt           | Amp        | p.P596L             | Homdel   | Homdel     | wt         | Homdel    | wt         | Hetloss   | p.V1244I    | Homdel     | P2229S, p.L738 | wt      | c.-124C>T |
| 237         | Anaplastic astrocytoma                      | GBM, IDH-wild, grade 4        | Male   | 53  | 7           | 1                                   | 7            | 1                                   | Amp          | wt           | Intact     | p.C362G             | Homdel   | Hetloss    | wt         | Homdel    | wt         | Intact    | wt          | Homdel     | wt             | wt      | c.-146C>T |
| 238         | Anaplastic astrocytoma                      | Astrocytoma, IDH-mut, grade 3 | Male   | 51  | 10          | 1                                   | 4            | 1                                   | Intact       | wt           | Intact     | wt                  | Intact   | Homdel     | wt         | Homdel    | p.G248D    | Hetloss   | wt          | Hetloss    | wt             | p.R132H | wt        |
| 239         | Anaplastic astrocytoma, IDH-wild, grade III | GBM, IDH-wild, grade 4        | Female | 67  | 6           | 1                                   | 6            | 1                                   | Intact       | wt           | Amp        | p.L62R              | Homdel   | Hetloss    | wt         | Intact    | wt         | Intact    | wt          | Intact     | wt             | wt      | c.-124C>T |
| 240         | Anaplastic astrocytoma, IDH-wild, grade III | GBM, IDH-wild, grade 4        | Female | 25  | 18          | 0                                   | 18           | 1                                   | Intact       | wt           | Intact     | p.A289V             | Intact   | Hetloss    | p.L325F    | Homdel    | wt         | Intact    | wt          | Intact     | wt             | wt      | c.-124C>T |
| 241         | Anaplastic astrocytoma, IDH-wild, grade III | NEC                           | Female | 67  | 11          | 0                                   | 11           | 0                                   | Intact       | wt           | Intact     | wt                  | Intact   | Intact     | wt         | Intact    | p.V450I    | Intact    | wt          | Intact     | wt             | wt      | wt        |
| 242         | Anaplastic astrocytoma, IDH-wild, grade III | GBM, IDH-wild, grade 4        | Male   | 29  | 4           | 0                                   | 4            | 0                                   | Intact       | wt           | Intact     | wt                  | Homdel   | Intact     | wt         | Intact    | wt         | Intact    | wt          | Intact     | wt             | wt      | c.-124C>T |
| 243         | Anaplastic astrocytoma, IDH-wild, grade III | GBM, IDH-wild, grade 4        | Female | 47  | 6           | 0                                   | 6            | 0                                   | Gain         | wt           | Intact     | p.K609N             | Intact   | Intact     | wt         | Intact    | p.R661Q    | Intact    | wt          | Intact     | p.S210T        | wt      | c.-124C>T |
| 244         | Anaplastic astrocytoma, IDH-wild, grade III | NEC                           | Male   | 70  | 0           | 0                                   | 0            | 0                                   | Intact       | p.I315N      | Intact     | wt                  | Intact   | Intact     | wt         | Intact    | wt         | Intact    | wt          | Intact     | wt             | wt      | wt        |
| 245         | Anaplastic astrocytoma, IDH-mut, grade III  | Astrocytoma, IDH-mut, grade 3 | Female | 60  | 0           | 0                                   | 0            | 0                                   | Intact       | wt           | Intact     | wt                  | Intact   | Intact     | wt         | Intact    | wt         | Intact    | wt          | Intact     | p.L2257V       | p.R132H | wt        |
| 246         | Anaplastic astrocytoma, IDH-wild, grade III | NEC                           | Female | 77  | 1           | 0                                   | 1            | 0                                   | Intact       | wt           | Intact     | wt                  | Intact   | Intact     | wt         | Intact    | wt         | Intact    | p.Q1891*    | Intact     | wt             | wt      | wt        |
| 247         | Anaplastic astrocytoma, IDH-wild, grade III | GBM, IDH-wild, grade 4        | Female | 58  | 7           | 0                                   | 7            | 0                                   | Intact       | wt           | Intact     | wt                  | Intact   | Intact     | p.R233*    | Intact    | wt         | Hetloss   | p.Y489*     | Intact     | wt             | wt      | c.-124C>T |
| 248         | Anaplastic astrocytoma, IDH-mut, grade III  | Astrocytoma, IDH-mut, grade 3 | Female | 34  | 6           | 0                                   | 6            | 0                                   | Intact       | wt           | Intact     | wt                  | Intact   | Intact     | wt         | Homdel    | wt         | Intact    | wt          | Intact     | wt             | p.R132H | wt        |
| 249         | Anaplastic astrocytoma, IDH-wild, grade III | GBM, IDH-wild, grade 4        | Female | 47  | 4           | 0                                   | 4            | 0                                   | Intact       | wt           | Amp        | p.P772_C775dup      | Homdel   | Homdel     | wt         | Homdel    | wt         | Intact    | wt          | Homdel     | wt             | wt      | c.-124C>T |
