# Supplementary material for: Molecular Genetic Profile of 300 Japanese Patients with Diffuse Gliomas Using a Glioma-tailored Gene Panel
Source: PubMed Central journal article supplement — Neurol Med Chir (Tokyo). 2022 Aug 27;62(9):391–9. doi: 10.2176/jns-nmc.2022-0103 (PMC9534570; doi:10.2176/jns-nmc.2022-0103), 2022-08-27
Supplement: 1349-8029-62-0391-s004.pdf [file 1349-8029-62-0391-s004.pdf]

Supplementary table. S4 Clinical information and molecular status in patients with oligodendroglial tumors.

| Research ID | Diagnosis                                                     | WHO2016 grade | Sex    | Age | PFS (months) | PFS censoring (0: censored, 1: rec) | CDKN2A/B | ARID1A    | IDH1    | TERTp     | CIC                  | FUBP1        |
|-------------|---------------------------------------------------------------|---------------|--------|-----|--------------|-------------------------------------|----------|-----------|---------|-----------|----------------------|--------------|
| 250         | Anaplastic oligodendroglioma, IDH-mutant and 1p/19q codeleted | grade III     | male   | 36  | 40           | 0                                   | intact   | wt        | p.R132H | c.-146C>T | p.P1751fs            | p.S11fs      |
| 251         | Oligodendroglioma, IDH-mutant and 1p/19q codeleted            | grade II      | female | 37  | 44           | 0                                   | intact   | wt        | p.R132H | c.-146C>T | c.3493-1G>A          | c.1769-2A>G  |
| 252         | Oligodendroglioma, IDH-mutant and 1p/19q codeleted            | grade II      | male   | 64  | 62           | 1                                   | intact   | wt        | p.R132H | c.-124C>T | p.R1111T             | wt           |
| 253         | Oligodendroglioma, IDH-mutant and 1p/19q codeleted            | grade II      | male   | 31  | 21           | 1                                   | intact   | wt        | p.R132H | c.-124C>T | wt                   | wt           |
| 254         | Oligodendroglioma, IDH-mutant and 1p/19q codeleted            | grade II      | female | 33  | 26           | 1                                   | intact   | wt        | p.R132H | c.-146C>T | c.3493-1G>T          | p.D458fs     |
| 255         | Anaplastic oligodendroglioma, IDH-mutant and 1p/19q codeleted | grade III     | male   | 42  | 44           | 0                                   | intact   | wt        | p.R132H | c.-124C>T | p.R1110T             | wt           |
| 256         | Anaplastic oligodendroglioma, IDH-mutant and 1p/19q codeleted | grade III     | male   | 37  | 53           | 0                                   | intact   | wt        | p.R132H | c.-146C>T | p.M1113T             | p.G491fs     |
| 257         | Anaplastic oligodendroglioma, IDH-mutant and 1p/19q codeleted | grade III     | female | 44  | 59           | 0                                   | intact   | wt        | p.R132H | c.-146C>T | wt                   | c.1844-6dupT |
| 258         | Oligodendroglioma, IDH-mutant and 1p/19q codeleted            | grade II      | female | 49  | 83           | 0                                   | intact   | wt        | p.R132H | c.-146C>T | p.K2423del           | wt           |
| 259         | Oligodendroglioma, IDH-mutant and 1p/19q codeleted            | grade II      | male   | 56  | 79           | 0                                   | intact   | wt        | p.R132H | c.-124C>T | wt                   | wt           |
| 260         | Anaplastic oligodendroglioma, IDH-mutant and 1p/19q codeleted | grade III     | male   | 58  | 13           | 1                                   | intact   | p.M1476fs | p.R132H | c.-124C>T | wt                   | p.Q585*      |
| 261         | Oligodendroglioma, IDH-mutant and 1p/19q codeleted            | grade II      | female | 47  | 88           | 0                                   | intact   | wt        | p.R132H | c.-124C>T | p.W2146*             | wt           |
| 262         | Anaplastic oligodendroglioma, IDH-mutant and 1p/19q codeleted | grade III     | female | 48  | 73           | 0                                   | intact   | wt        | p.R132H | c.-146C>T | p.R1110W             | c.2T>G       |
| 263         | Oligodendroglioma, IDH-mutant and 1p/19q codeleted            | grade II      | female | 52  | 41           | 0                                   | intact   | wt        | p.R132H | c.-124C>T | c.4191+2T>C          | p.G532fs     |
| 264         | Oligodendroglioma, IDH-mutant and 1p/19q codeleted            | grade II      | male   | 48  | 60           | 0                                   | intact   | wt        | p.R132H | c.-124C>T | wt                   | wt           |
| 265         | Anaplastic oligodendroglioma, IDH-mutant and 1p/19q codeleted | grade III     | female | 35  | 55           | 0                                   | intact   | wt        | p.R132H | c.-124C>T | p.R1331*             | p.Q93fs      |
| 266         | Oligodendroglioma, IDH-mutant and 1p/19q codeleted            | grade II      | male   | 54  | 14           | 0                                   | intact   | wt        | p.R132H | c.-124C>T | wt                   | p.E288fs     |
| 267         | Anaplastic oligodendroglioma, IDH-mutant and 1p/19q codeleted | grade III     | male   | 46  | 70           | 1                                   | homdel   | wt        | p.R132H | c.-146C>T | p.A1162T             | p.D458fs     |
| 268         | Anaplastic oligodendroglioma, IDH-mutant and 1p/19q codeleted | grade III     | male   | 70  | 14           | 0                                   | intact   | wt        | p.R132H | c.-124C>T | p.R1110W             | wt           |
| 269         | Oligodendroglioma, IDH-mutant and 1p/19q codeleted            | grade II      | female | 49  | 29           | 0                                   | intact   | wt        | p.R132H | c.-124C>T | p.V1515fs            | wt           |
| 270         | Anaplastic oligodendroglioma, IDH-mutant and 1p/19q codeleted | grade III     | female | 41  | 9            | 1                                   | intact   | p.W1073*  | p.R132H | c.-124C>T | wt                   | c.536+2T>C   |
| 271         | Anaplastic oligodendroglioma, IDH-mutant and 1p/19q codeleted | grade III     | male   | 71  | 23           | 0                                   | intact   | wt        | p.R132H | c.-124C>T | p.F1119del, p.R1331* | wt           |
| 272         | Anaplastic oligodendroglioma, IDH-mutant and 1p/19q codeleted | grade III     | male   | 41  | 20           | 0                                   | intact   | wt        | p.R132H | c.-146C>T | p.F2407C             | p.E150fs     |
| 273         | Anaplastic oligodendroglioma, IDH-mutant and 1p/19q codeleted | grade III     | male   | 52  | 70           | 1                                   | homdel   | wt        | p.R132H | c.-146C>T | wt                   | p.D458fs     |
| 274         | Oligodendroglioma, IDH-mutant and 1p/19q codeleted            | grade II      | male   | 47  | 0            | 0                                   | intact   | wt        | p.R132H | c.-124C>T | wt                   | wt           |
| 275         | Oligodendroglioma, IDH-mutant and 1p/19q codeleted            | grade II      | female | 48  | 12           | 0                                   | intact   | wt        | p.R132H | c.-146C>T | wt                   | wt           |
| 276         | Oligodendroglioma, IDH-mutant and 1p/19q codeleted            | grade II      | female | 52  | 17           | 0                                   | intact   | wt        | p.R132H | c.-124C>T | wt                   | p.?          |
| 277         | Oligodendroglioma, IDH-mutant and 1p/19q codeleted            | grade II      | male   | 40  | 16           | 0                                   | intact   | wt        | p.R132H | c.-124C>T | p.R228W, p.V1474G    | p.W537*      |
| 278         | Oligodendroglioma, IDH-mutant and 1p/19q codeleted            | grade II      | male   | 48  | 19           | 0                                   | intact   | wt        | p.R132H | c.-124C>T | p.R215W              | wt           |
| 279         | Anaplastic oligodendroglioma, IDH-mutant and 1p/19q codeleted | grade III     | female | 36  | 18           | 0                                   | intact   | wt        | p.R132H | c.-124C>T | wt                   | p.W517*      |
| 280         | Anaplastic oligodendroglioma, IDH-mutant and 1p/19q codeleted | grade III     | female | 43  | 3            | 0                                   | intact   | wt        | p.R132H | c.-124C>T | p.R215W              | wt           |
| 281         | Oligodendroglioma, IDH-mutant and 1p/19q codeleted            | grade II      | male   | 46  | 1            | 0                                   | intact   | wt        | p.R132H | c.-124C>T | p.Q834*              | wt           |
| 282         | Anaplastic oligodendroglioma, IDH-mutant and 1p/19q codeleted | grade III     | female | 40  | 11           | 1                                   | intact   | wt        | p.R132H | c.-124C>T | p.F207L              | wt           |
| 283         | Oligodendroglioma, IDH-mutant and 1p/19q codeleted            | grade II      | female | 63  | 22           | 0                                   | intact   | wt        | p.R132H | c.-124C>T | p.R1214*, p.T1043N   | wt           |
| 284         | Anaplastic oligodendroglioma, IDH-mutant and 1p/19q codeleted | grade III     | male   | 45  | 24           | 0                                   | intact   | wt        | p.R132H | c.-124C>T | wt                   | wt           |
| 285         | Anaplastic oligodendroglioma, IDH-mutant and 1p/19q codeleted | grade III     | female | 28  | 11           | 1                                   | intact   | p.Y560*   | p.R132H | c.-124C>T | wt                   | p.D181Rfs*15 |
| 286         | Anaplastic oligodendroglioma, IDH-mutant and 1p/19q codeleted | grade III     | male   | 47  | 11           | 1                                   | intact   | wt        | p.R132H | c.-124C>T | p.D369Vfs*7          | p.P283Kfs*21 |
| 287         | Oligodendroglioma, IDH-mutant and 1p/19q codeleted            | grade II      | male   | 49  | 239          | 1                                   | intact   | wt        | p.R132H | c.-146C>T | p.E302*              | p.I136V      |
| 288         | Anaplastic oligodendroglioma, IDH-mutant and 1p/19q codeleted | grade III     | male   | 37  | 10           | 0                                   | intact   | wt        | p.R132H | c.-124C>T | p.P1594S             | wt           |
| 289         | Oligodendroglioma, IDH-mutant and 1p/19q codeleted            | grade II      | male   | 57  | 10           | 0                                   | intact   | wt        | p.R132H | c.-124C>T | wt                   | wt           |
| 290         | Oligodendroglioma, IDH-mutant and 1p/19q codeleted            | grade II      | female | 40  | 6            | 0                                   | intact   | wt        | p.R132H | c.-124C>T | p.R1171Pfs*20        | c.1345-1G>A  |
| 291         | Anaplastic oligodendroglioma, IDH-mutant and 1p/19q codeleted | grade III     | female | 70  | 6            | 0                                   | homdel   | wt        | p.R132H | c.-124C>T | p.K1330*             | wt           |
| 292         | Oligodendroglioma, IDH-mutant and 1p/19q codeleted            | grade II      | male   | 41  | 0            | 0                                   | intact   | wt        | p.R132H | c.-124C>T | p.R274*, c.4195+1G>A | wt           |
| 293         | Anaplastic oligodendroglioma, IDH-mutant and 1p/19q codeleted | grade III     | male   | 68  | 2            | 0                                   | intact   | p.T294P   | p.R132H | c.-124C>T | wt                   | wt           |
