# Supplementary material for: Molecular Genetic Profile of 300 Japanese Patients with Diffuse Gliomas Using a Glioma-tailored Gene Panel
Source: PubMed Central journal article supplement — Neurol Med Chir (Tokyo). 2022 Aug 27;62(9):391–9. doi: 10.2176/jns-nmc.2022-0103 (PMC9534570; doi:10.2176/jns-nmc.2022-0103), 2022-08-27
Supplement: 1349-8029-62-0391-s005.pdf [file 1349-8029-62-0391-s005.pdf]

Supplementary Table S5. *EGFR* mutations summarized from 303 diffuse gliomas.

| <i>EGFR</i> mutation | Domain               | n |
|----------------------|----------------------|---|
| A289V/D/T            | Extracellular domain | 7 |
| R108K                | Extracellular domain | 4 |
| D256V/Y              | Extracellular domain | 2 |
| S437C                | Extracellular domain | 2 |
| G598V                | Extracellular domain | 2 |
| T790M                | Kinase domain        | 2 |
| L62R                 | Extracellular domain | 1 |
| R222C                | Extracellular domain | 1 |
| S229C                | Extracellular domain | 1 |
| F254I                | Extracellular domain | 1 |
| C362G                | Extracellular domain | 1 |
| T363I                | Extracellular domain | 1 |
| S442I                | Extracellular domain | 1 |
| A508V                | Extracellular domain | 1 |
| G588D                | Extracellular domain | 1 |
| P596L                | Extracellular domain | 1 |
| K609N                | Extracellular domain | 1 |
| L747P                | Kinase domain        | 1 |
| S768I                | Kinase domain        | 1 |
| V774M                | Kinase domain        | 1 |
| N771_H773dup         | Kinase domain        | 1 |
| P772_C775dup         | Kinase domain        | 1 |
| D984N                | Intracellular domain | 1 |
