# Supplementary material for: Molecular Genetic Profile of 300 Japanese Patients with Diffuse Gliomas Using a Glioma-tailored Gene Panel
Source: PubMed Central journal article supplement — Neurol Med Chir (Tokyo). 2022 Aug 27;62(9):391–9. doi: 10.2176/jns-nmc.2022-0103 (PMC9534570; doi:10.2176/jns-nmc.2022-0103), 2022-08-27
Supplement: 1349-8029-62-0391-s006.pdf [file 1349-8029-62-0391-s006.pdf]

Supplementary Table S6. *PDGFRA* mutations summarized from 303 diffuse gliomas.

| <i>PDGFRA</i> mutation | Domain               | N |
|------------------------|----------------------|---|
| N468S                  | Extracellular domain | 3 |
| C235R/Y                | Extracellular domain | 2 |
| D602Y/_I603delinsV     | Kinase domain        | 2 |
| D842Y/V                | Kinase domain        | 2 |
| E229K                  | Extracellular domain | 1 |
| T230M                  | Extracellular domain | 1 |
| V232M                  | Extracellular domain | 1 |
| V243G                  | Extracellular domain | 1 |
| P250L                  | Extracellular domain | 1 |
| L275S                  | Extracellular domain | 1 |
| V277D                  | Extracellular domain | 1 |
| G286R                  | Extracellular domain | 1 |
| Y288N                  | Extracellular domain | 1 |
| S308P                  | Extracellular domain | 1 |
| I315N                  | Extracellular domain | 1 |
| P343S                  | Extracellular domain | 1 |
| P345S                  | Extracellular domain | 1 |
| L354V                  | Extracellular domain | 1 |
| I363F                  | Extracellular domain | 1 |
| A396P                  | Extracellular domain | 1 |
| G439C                  | Extracellular domain | 1 |
| W447C                  | Extracellular domain | 1 |
| V536E                  | Transmembrane domain | 1 |
| G652E                  | Kinase domain        | 1 |
| P653Q                  | Kinase domain        | 1 |
| R690K                  | Kinase domain        | 1 |
